# Supplementary material
Source: publisher figshare collection journal article supplement (https://gsajournals.figshare.com/articles/dataset/_/13186817)
Supplement: Supplementary file 1 [file 1]

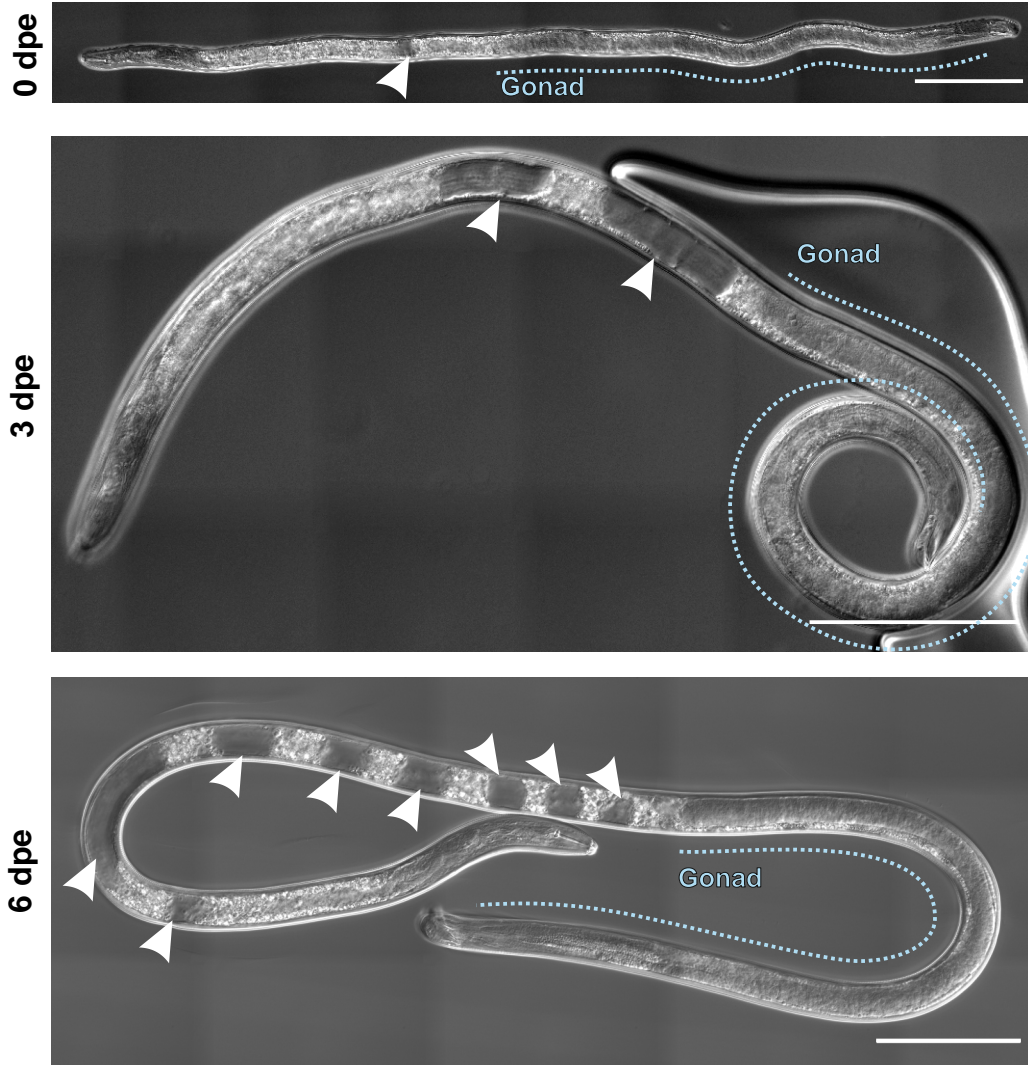

**Figure S1: Progressive appearance of large vacuuous structures over time in *H. schachtii* virgin males.** Representative images of virgin males at 0, 3, and 6 days post emergence (dpe). Arrows indicate vacuuous structures. Blue line indicates the region of the body occupied by the gonad. Scale bars indicate 100  $\mu\text{m}$ .
