# Supplementary material
Source: publisher figshare collection journal article supplement (https://gsajournals.figshare.com/articles/dataset/_/13186817)
Supplement: Supplementary file 2 [file 1]

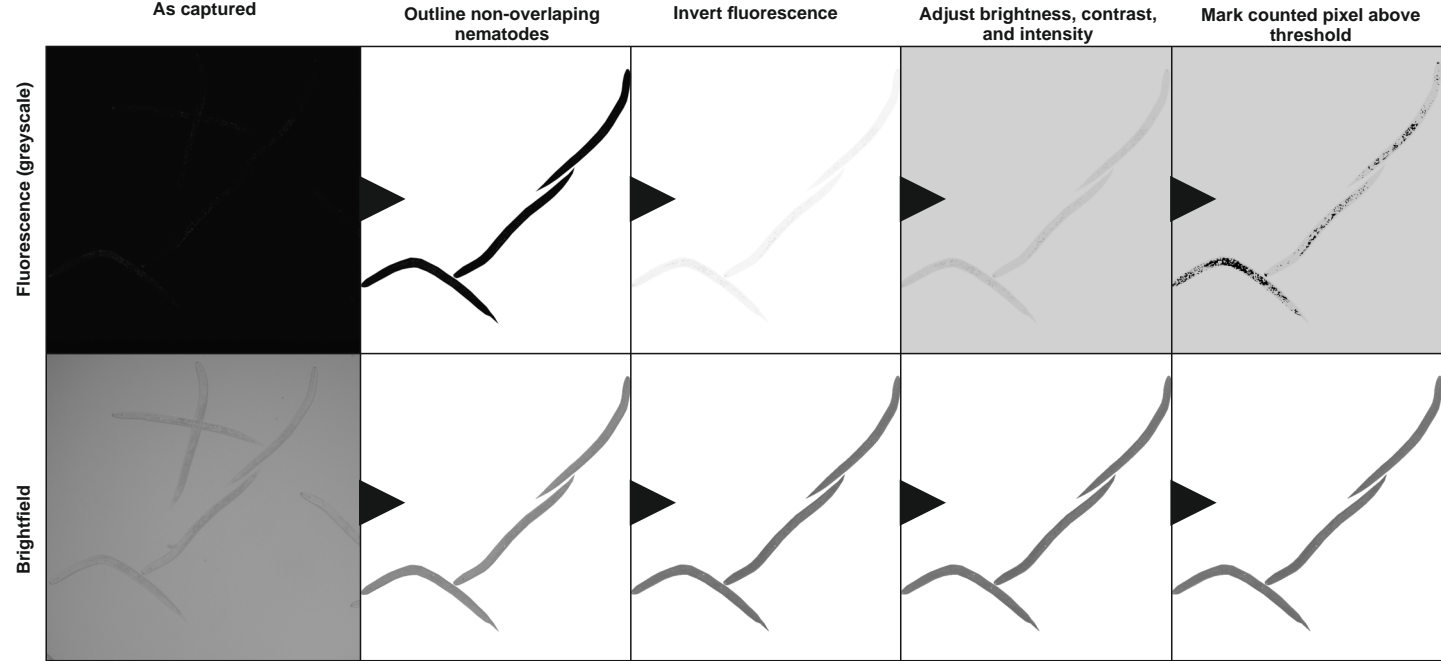

**Figure S2: Quantification of fluorescence.** To quantify the fluorescence of individual nematodes, the image of each nematode was cropped out, the colours inverted, their brightness, contrast, and intensity adjusted for both treatment and control (Brightness -17%, Contrast + 71%, Intensity -27%), and the number of pixels per nematode that exceeded an empirically determine number of shades of variance (ranging between 0 - 255) from the background grey were counted and marked on the image using a custom script.
